# Supplementary material
Source: MDPI journal article supplement (https://www.mdpi.com/2073-4344/12/10/1245)
Supplement: s1 [file s1]

## Supplementary Information

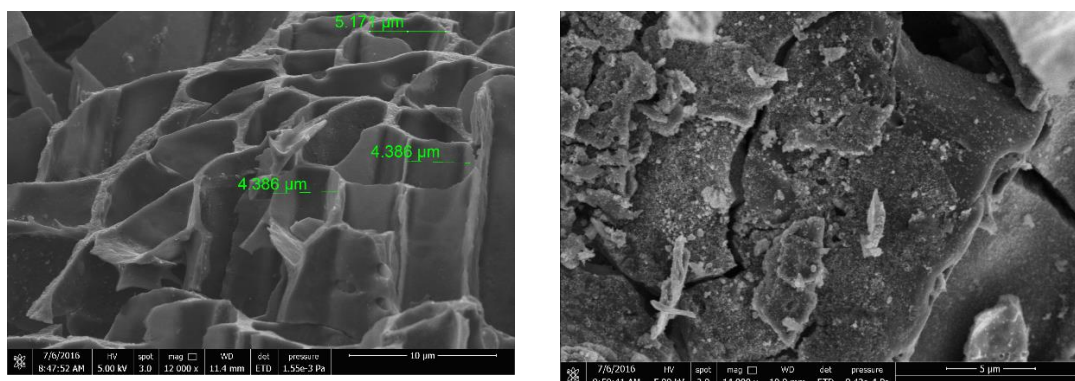

**Figure S1.** SEM images of pristine BC.

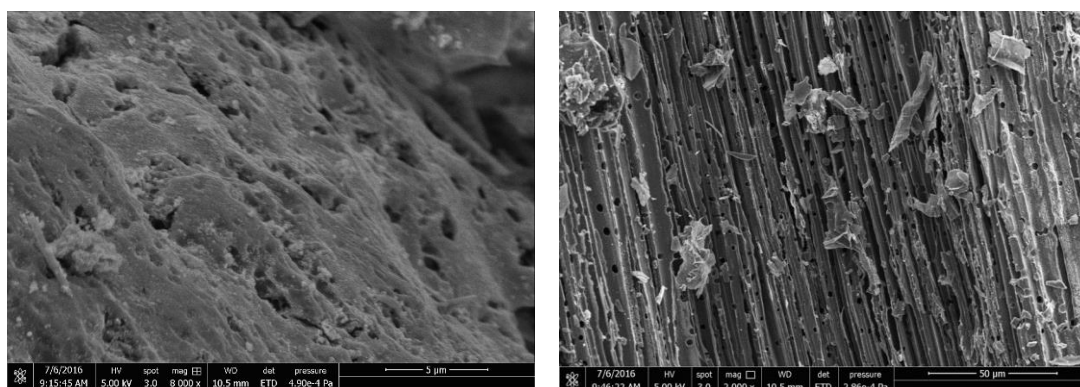

**Figure S2.** SEM images for the acid-treated BC sample.

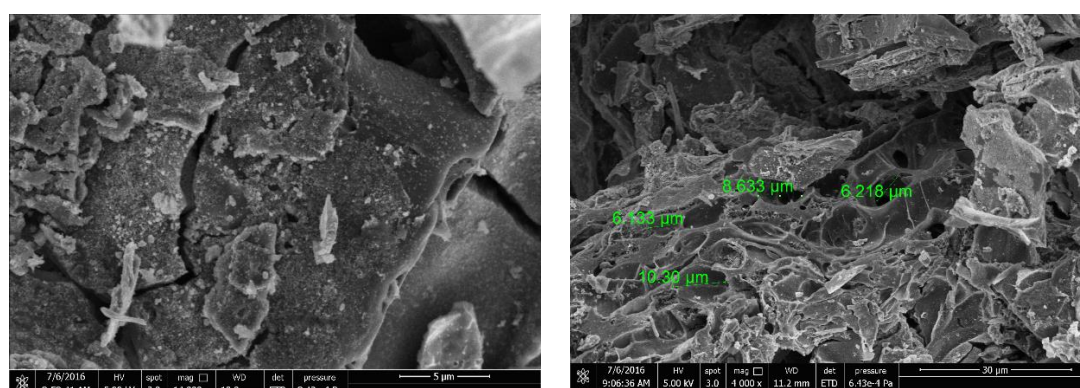

**Figure S3.** SEM images for the base-treated BC sample.

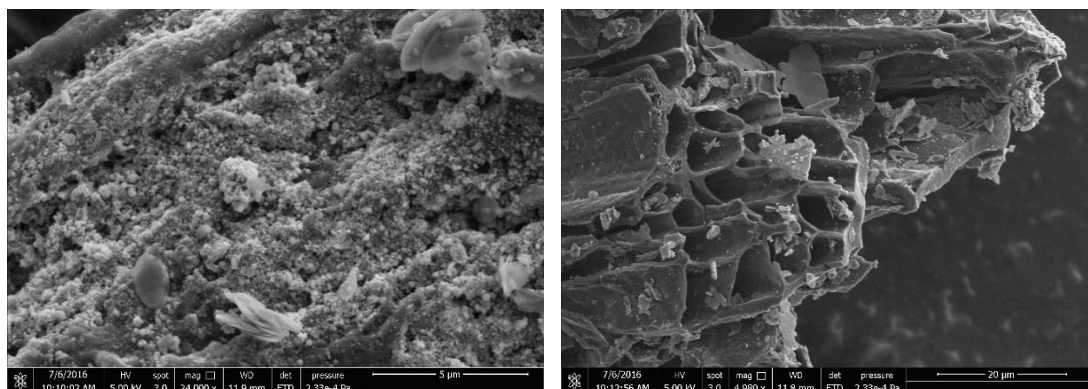

**Figure S4.** SEM images for the water-treated BC sample.

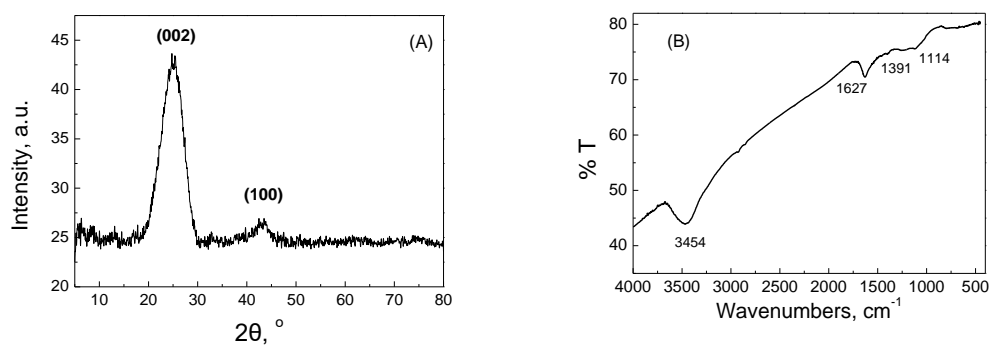

**Figure S5.** XRD pattern (A) and FTIR spectrum (B) of the acid-treated BC.

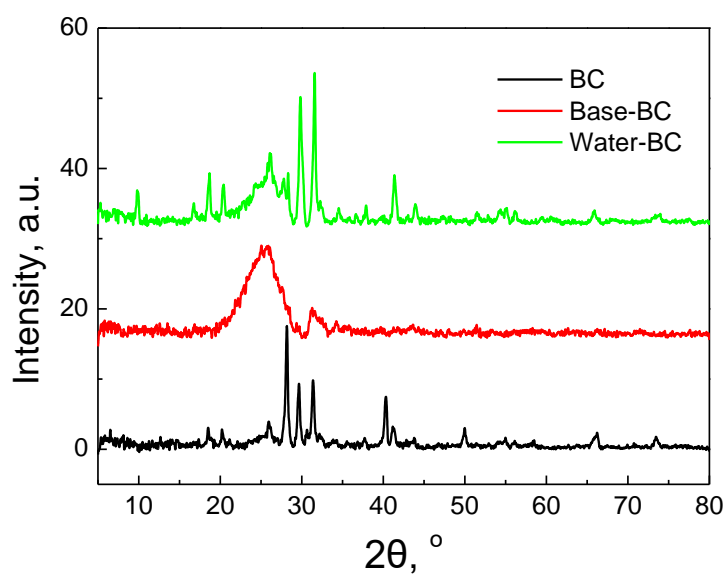

**Figure S6.** XRD patterns of the pristine BC and the base- and water-treated samples..

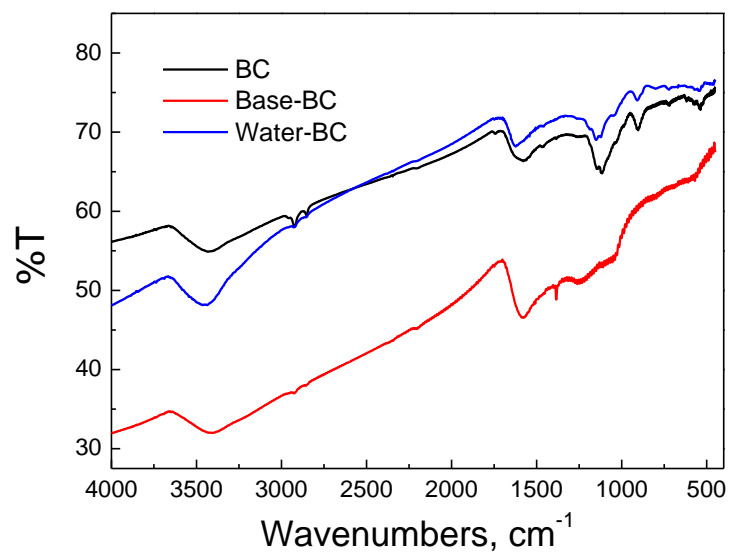

**Figure S7.** FTIR spectra of the pristine BC and the base- and water-treated samples.
